# Supplementary material for: Modulation of flight and feeding behaviours requires presynaptic IP3Rs in dopaminergic neurons
Source: eLife. 2020 Nov 6;9:e62297. doi: 10.7554/eLife.62297 (PMC7647402; doi:10.7554/eLife.62297)
Supplement: Figure 2—source data 1. [file elife-62297-fig2-data1.xlsx]

## Sheet: figure 2A
ItprDN/+	dsitpr/+		TH/+	TH>dsitpr	th> Itpr DN	TH> Itpr+		THD'/+	THD'>GFP	THD'>dsitpr	THD'> Itpr DN	THD'> Itpr+
900	900		889	190	231	900		630	570	450	258	584
653	900		868	204	44	714		159	900	128	140	298
900	900		890	15	250	570		732	221	190	124	220
900	785		900	285	150	585		900	690	320	90	541
900	605		700	30	244	592		900	330	120	143	362
900	829		603	270	142	371		642	900	900	201	431
331	900		235	50	221	900		755	900	70	255	312
900	768		486	565	116	170		528	800	120	255	160
900	330		900	538	900	495		594	680	110	219	631
900	520		900	62	26	394		834	660	150	394	0
900	900		900	544	25	261		432	320	80	188	298
580	540		900	419	251	532		654	405	121	215	410
850	670		900	900	201	325		591	900	230	79	680
780	770		530	115	103	353		365	900	270	183	685
830	382		203	630	3	208		900	900	320	900	306
900	900		900	685	87	423		900	620	130	178	305
900	343		900	330	50	205		900	390	630	234	433
900	900		900	750	260	268		158	462	582	358	342
650	530		295	900	150	180		900	750	310	525	900
750	360		691	207	120	389		900	825	200	291	629
890	430		615	750	12	780		900	899	91	240	307
650	590		518	590	576	333		900	900	265	220	418
900	870		900	490	283	542		900	900	10	275	445
530	360		685	161	218	850		303	670	900	455	174
510	360		634	560	118	720		900	900	70	305	530
691	695		900	500	276	310		312	850	320	166	510
615	900		500	160	373	615		20	900	130	168	395
518	900		480	430	76	518		900	900	65	222	396
900	315		185	70	10			301	850	105	250	594
	620		900	400	40			900	809	129		480
	795		740					900				198
	435		420									900
	420		725
	840
