# Supplementary material for: Modulation of flight and feeding behaviours requires presynaptic IP3Rs in dopaminergic neurons
Source: eLife. 2020 Nov 6;9:e62297. doi: 10.7554/eLife.62297 (PMC7647402; doi:10.7554/eLife.62297)
Supplement: Figure 2—source data 2. [file elife-62297-fig2-data2.xlsx]

## Sheet: Figure 2C
UAS Itpr; ka1091/+	UAS Itpr; ka1091/ug3	TH> Itpr (ka1091/ug3)	THD' > Itpr (ka1091/ug3)	THD1 > Itpr (ka1091/ug3)
530	0	187	420	460
554	0	45	900	900
875	0	110	0	900
753	0	23	900	420
825	0	424	180	257
540	0	541	194	177
826	0	301	381	147
695	0	330	60	0
330	0	0	65	188
535	0	0	51	340
836	0	360	108	670
900	0	487	456	85
900	0	670	142	82
900	0	900	96	582
900	0	270	150	320
659	0	126	310	155
770	0	174	90	232
900	0	270	98	462
900	0	315	596	50
813	0	170	202	45
513	0	540	155	110
900	0	180	41	200
900	0	205	523	265
806	0	375	280	323
640	0	270	426	85
900	0	268	262	330
730	0	335	150	147
410	0	115	94	205
900	0	331	900	243
563	0	810	49	69
800	0	358	900
900	0	228	30
900	0	541	120
900	0	360
900	0	504
870	0	323
667	0	125
880	0	315
832	0	497
840	0	384
592	0	484
686	0	134
900	0	193
850	0	99
795	0	171
900	0	95
676	0	278
600	0	560
900	0	172
820	0	327
801	0	189
655	0	240
750	0	440
810	0	134
655	0	365
345	0	251
900	0	785
774	0	135
800	0	146
707	0	290
541	0
700	0
585	0
427	0
