# Supplementary material for: Modulation of flight and feeding behaviours requires presynaptic IP3Rs in dopaminergic neurons
Source: eLife. 2020 Nov 6;9:e62297. doi: 10.7554/eLife.62297 (PMC7647402; doi:10.7554/eLife.62297)
Supplement: Figure 2—source data 3. [file elife-62297-fig2-data3.xlsx]

## Sheet: Figure 2E
ItprDN/+		MB504B/+	MB504B> ItprDN	MB504B> Itpr+		MB438B/+	MB438B> ItprDN	MB438B> Itpr+		MB296B/+	MB296B> GFP	MB296B> ItprDN	MB296B> Itpr+
900		900	10	680		900	900	740		860	900	18	478
900		675	400	685		900	495	405		900	900	40	478
900		900	87	357		900	642	413		450	845	271	389
900		900	140	159		214	800	900		486	85	40	331
331		900	410	577		900	650	418		535	502	60	510
900		667	60	415		900	520	420		580	610	0	483
900		557	50	187		540	449	116		900	900	80	322
900		900	70	353		555	405	99		779	396	90	900
900		900	10	940		900	900	599		480	420	225	457
580		860	290	223		900	338	417		460	900	50	550
850		900	30	608		900	557	900		665	541	310	418
780		450	0	0		900	900	305		331	230	80	385
830		486	370	484		900	900	526		440	900	10	542
900		535	30	297		320	562	900		809	250	60	675
900		580	50	411		500	145	437		259	900	850	870
900		900	10	674		515	215	400		634	380	8	249
650		779	54	677		900	670	410		900	900	23	388
750		480	60	300		900	650	867		845	530	500	400
890		430	154	690		520	900	900		707	330	630	596
650		390	40	490		900	344	900		459	747	330	696
900		250	70	310		764	735	900		900	900	0	380
530		610	106	355		586	357	125		799	755	300	570
510		900	82	350		900	900	216		523	430	118	164
691		630	95	770		900	243	310		860	400	50	900
615		900	50	552		735	440	302		900	470	118	710
518		484	270	170		410	453	900		450	785	120	900
900		900	250	175		615	620				900	190	712
			112	364		552	586				680	265	623
			190			170	900					150
							900					250
							735					220
							410					--
							615					--
												--
												--
												--
												--
												--
