# Supplementary material for: Modulation of flight and feeding behaviours requires presynaptic IP3Rs in dopaminergic neurons
Source: eLife. 2020 Nov 6;9:e62297. doi: 10.7554/eLife.62297 (PMC7647402; doi:10.7554/eLife.62297)
Supplement: Figure 2—source data 4. [file elife-62297-fig2-data4.xlsx]

## Sheet: Figure 2- figure supplement 1 A
ItprDN/+	dsitpr/+		nsyb/+	nsyb>dsitpr	nsyb> Itpr DN	nsyb> Itpr+
900	520		723	172	90	716
653	900		900	251	86	385
900	540		115	790	190	443
900	670		390	110	81	623
900	770		460	295	20	190
900	382		900	365	90	327
331	900		580	400	388	453
900	343		240	130	378	173
900	900		520	135	226	221
900	530		680	210	584	194
900	360		320	215	54	337
580	430		360	900	283	494
850	590		440	150	900	241
780	870		750	412	145	230
830	360		393	267	186	500
900	360		625	539	245	576
900	695		900	530	687	900
900	900		340	270	150	231
650	900		900	95	595	229
750	315		336	130	527	309
890	620		900	195	477	320
650	795		900	90	104	360
900	435			50	473	420
530	420			61	131	467
510	840			140	207	386
691					79	470
615					325	492
518					70	528
900					50	405
					90	682
					93
					102
					504
					620
					620
