# Supplementary material for: Modulation of flight and feeding behaviours requires presynaptic IP3Rs in dopaminergic neurons
Source: eLife. 2020 Nov 6;9:e62297. doi: 10.7554/eLife.62297 (PMC7647402; doi:10.7554/eLife.62297)
Supplement: Figure 2—source data 5. [file elife-62297-fig2-data5.xlsx]

## Sheet: Figure 2- figure supplement 1 B
UAS Itpr+; ka1091/+	UAS Itpr+; ka1091/ug3	nsyb > UAS Itpr+ (ka1091/ug3)	TH > UAS Itpr+ (ka1091/ug3)	THC' > UAS Itpr+ (ka1091/ug3)	THD' > UAS Itpr+ (ka1091/ug3)	THD1 > UAS Itpr+ (ka1091/ug3)
30	0	0	30	0	30	30
30	0	0	30	0	30	30
30	0	30	30	0	0	30
30	0	0	23	0	30	30
30	0	20	30	0	30	30
30	0	1	30	0	30	30
30	0	0	30	0	30	30
30	0	0	30	0	30	0
30	0	0	0	0	30	30
30	0	0	0	0	30	30
30	0	0	30	0	30	30
30	0	0	30	0	30	30
30	0	0	30	0	30	30
30	0	0	30	0	30	30
30	0	15	30	0	30	30
30	0	0	30	0	30	30
30	0	0	30	0	30	30
30	0	3	30	0	30	30
30	0	4	30	0	30	30
30	0	0	30	0	30	30
30	0	5	30	0	30	30
30	0	10	30	0	30	30
30	0	0	30	0	30	30
30	0	0	30	0	30	30
30	0	22	30	0	30	30
30	0	15	30	0	30	30
30	0	0	30	0	30	30
30	0	0	30	0	30	30
30	0	0	30	0	30	30
30	0	0	30	0	30	30
30	0		30		30
30	0		30		30
30	0		30		30
30	0		30
30	0		30
30	0		30
30	0		30
30	0		30
30	0		30
30	0		30
30	0		30
30	0		30
30	0		30
30	0		30
30	0		30
30	0		30
30	0		30
30	0		30
30	0		30
30	0		30
30	0		30
30	0		30
30	0		30
30	0		30
30	0		30
30	0		30
30	0		30
30	0		30
30	0		30
30	0		30
30	0
30	0
30	0
30	0
