# Supplementary material for: Modulation of flight and feeding behaviours requires presynaptic IP3Rs in dopaminergic neurons
Source: eLife. 2020 Nov 6;9:e62297. doi: 10.7554/eLife.62297 (PMC7647402; doi:10.7554/eLife.62297)
Supplement: Figure 2—source data 6. [file elife-62297-fig2-data6.xlsx]

## Sheet: Figure 2- figure supplement 1 D
uasdn/+		MB058B/+	MB058B>ItprDN	MB058B>Itpr+		MB304B/+	MB304B>ItprDN	MB304B>Itpr+		MB320C/+	MB320C>ItprDN	MB320C>Itpr+		MB630B/+	MB630B>ItprDN	MB630B>Itpr+
900		900	321	870		900	156	620		605	481	900		580	900	338
653		781	208	577		900	455	495		430	592	519		313	256	900
900		630	20	238		236	444	592		390	298	459		900	469	615
900		900	350	209		725	830	509		250	299	284		230	490	505
900		900	205	900		526	900	626		610	80	139		590	272	520
900		675	330	0		639	317	216		900	245	128		582	900	430
331		900	277	20		488	900	503		630	35	424		350	340	260
900		900	345	420		254	391	410		900	280	301		900	521	405
900		900	222	590		900	447	281		484	900	439		350	406	220
900		667	900	194		900	446	900		900	459	324		900	412	202
900		557	594	495		525	900	237		900	430	682		255	900	120
580		900	142	592		523	900	900		900	180	680		380	232	199
850		900	710	509		900	382	310		365	322	685		900	390	410
780		900	255	626		520	900	235		900	489	357		242	900	316
830		553	189	216		460	900	900		900	230	159		414	391	510
900		880	130	503		374	310	460		557	330	577		366	447	485
900		215	423	410		271	395	340		900	415	300		690	446	666
900		220	50	645		900	462	410		900	518	485		900	900	655
650		878	900	655		900	322	598		860	615	490		860	900	900
750		660	335	900		271	520	600		900	728	310		900	382	890
890		880	567	640		900	200	310		450	306	355		670	900	237
650		790	900	550		900	900	310		756	484	799		880	556	545
900		598	900	900		438	900	245		900	280	770		788	512	660
530		800	683	845		900	799	510		900	543	552		678	900	129
510		850	190	200		900	870	576		724	900	170		805	900	900
691		809	35	900		900	559	199		900	796	900		900	683	900
615		259	340	900		900	565	140		382	590	900		900	190	660
518		634	880	530		460	686	250		860	582	900		286	795	789
900		900	760	670		900	808	247		900	350	445		578	679	889
		845	900	557		271		900		900	900	680		900	880	900
		707		900		258		315
