# Supplementary material for: Modulation of flight and feeding behaviours requires presynaptic IP3Rs in dopaminergic neurons
Source: eLife. 2020 Nov 6;9:e62297. doi: 10.7554/eLife.62297 (PMC7647402; doi:10.7554/eLife.62297)
Supplement: Figure 3—source data 1. [file elife-62297-fig3-data1.xlsx]

## Sheet: Figure3A
18 (degree)				Whole pupal (29 degree)				0-48 APF (29 degree)				48-96 APF (29 degree)				adults (29 degree)
THD'/+	ItprDN/+	THD'>ItprDN		THD'/+	ItprDN/+	THD'>ItprDN		THD'/+	ItprDN/+	THD'>ItprDN		THD'/+	ItprDN/+	THD'>ItprDN		THD'/+	ItprDN/+	THD'>ItprDN
900	470	900		900	75	100		900	353	25		819	97	328		300	621	594
397	341	463		47	785	30		430	900	570		735	690	60		800	564	635
875	415	290		900	260	59		134	277	381		116	62	122		735	407	399
900	670	370		119	790	280		510	90	160		212	363	86		620	900	120
900	827	539		154	900	165		302	268	770		900	100	241		585	418	241
900	51	440		890	266	194		650	570	440		278	10	777		882	422	900
119	900	900		613	270	110		700	900	450		227	670	70		405	671	294
424	380	900		274	695	121		900	777	900		510	900	308		407	430	257
30	110	315		196	599	10		180	900	415		349	25	194		435	606	235
493	770	460		835	316	70		290	206	670		723	130	210		595	900	547
900	900	676		715	900	125		280	511	827		790	53	760		845	353	900
228	158	370		890	498	65		790	530	671		551	700	80		453	440	182
260	160	360		383	393	285		900	640	430		274	175	220		485	881	6
850	341	658		618	179	0		366	310	606		456	296	225		487	395	900
780	485	551		126	220	38		470	780	900		890	250	230		795	405	900
425	73	290		72	900	41		695	900	353		500	278	121		545	900	656
585	900	900		453	900	93		650	250	440		874	550	0		663	724	75
635	897	306		285	384	325		350	360	881		396	797	900		564	567	900
720	900	373		387	20	45		900	341	395		900	456	900		786	870	465
822	400	239		461	260	50		550	450	405		715	900	900		588	900	870
623	900	960		465	131	53		350	70	585		790	900	129		752	694	900
481	586	262		900	278	140		250	880	496		583	786	160		850	343	900
585	369	296		80	314	240		320	580	740		518	68	55		900	423	900
521	382	347		160	102	480		900	900	900		225	490	150		900	818	80
900	538	750		290	900	214		900	400	900		100	640	75		820	598	220
900	865	272		860	20	40		500	900	900		352	805	130		900	900	225
880	598	900		85	825	64		785	250	900		582	83	250		780	900	230
900	350	900		900	520	65		202	350	820		587	698	450		825	353	900
785	222	655		407	580	155		658	230	400		460	176	314		900	423	780
820	494	640		148	682	0		900	825	852		565	280	55		883	828	900
	556				635	10		900	900			900	160	68		900	900	900
												80	290	85		799	900
												160	860	387		900	900
												290		61		900
												860		25		900
												85		130
														134
														115
														25
														91
