# Supplementary material for: Modulation of flight and feeding behaviours requires presynaptic IP3Rs in dopaminergic neurons
Source: eLife. 2020 Nov 6;9:e62297. doi: 10.7554/eLife.62297 (PMC7647402; doi:10.7554/eLife.62297)
Supplement: Figure 3—source data 2. [file elife-62297-fig3-data2.xlsx]

## Sheet: Figure3B
		larval	0-48 h APF	48-96 h APF	adults
UAS Itpr+ /+	Ka1091/ug3 (ku)	GAl80ts; THGAL4 > UAS Itpr+ (ku)
621	0	0	0	18	0
564	0	0	0	215	0
407	0	0	0	111	0
900	0	0	0	20	0
418	0	0	0	30	0
422	0	0	0	101	0
671	0	0	0	27	0
430	0	0	0	8	0
606	0	0	0	900	0
850	0	0	0	650	0
353	0	0	3	5	0
440	0	0	0	341	0
881	0	0	0	112	0
395	0	0	0	220	0
405	0	0	0	150	0
900	0	0	0	900	0
724	0	0	0	450	0
567	0	0	0	320	0
870	0	0	0	220	0
895	0	0	0	15	0
694	0	0	0	435	0
343	0	0	0	180	0
423	0	0	0	800	0
818	0	0	0		0
598	0	0	0		0
25	0	0	0		0
900	0	0	0		0
353	0	0	3		0
423	0	0	0		0
580	0	0	0		0
698			0
900			0
900			0
