# Supplementary material for: Modulation of flight and feeding behaviours requires presynaptic IP3Rs in dopaminergic neurons
Source: eLife. 2020 Nov 6;9:e62297. doi: 10.7554/eLife.62297 (PMC7647402; doi:10.7554/eLife.62297)
Supplement: Figure 3—source data 4. [file elife-62297-fig3-data4.xlsx]

## Sheet: Figure 3D
18 degree				Whole pupal (29 degree)				0-48 APF (29 degree)				48-96 APF (29 degree)				adults (29 degree)
thd';gal80/+	dsmAChR/+	thd';gal80>dsmAChR		thd';gal80/+	dsmAChR/+	thd';gal80>dsmAChR		thd';gal80/+	dsmAChR/+	thd';gal80>dsmAChR		thd';gal80/+	dsmAChR/+	thd';gal80>dsmAChR		thd';gal80/+	dsmAChR/+	thd';gal80>dsmAChR
900	433	900		900	299	336		435	900	346		535	899	774		900	310	370
900	440	386		900	253	320		430	725	210		830	900	112		900	510	360
766	800	570		630	793	463		900	900	715		900	900	900		228	390	900
820	650	900		900	570	900		370	900	433		560	900	250		510	225	40
766	550	865		385	295	900		570	625	440		570	599	348		599	900	90
655	808	481		490	762	124		250	900	800		666	345	34		270	900	900
550	365	849		570	200	25		900	440	650		900	876	475		900	330	618
900	330	881		730	900	900		510	516	550		900	789	900		70	570	321
900	570	900		885	330	20		276	585	900		195	832	181		570	525	517
333	525	900		730	355	660		397	683	900		740	676	280		250	465	900
777	465	211		630	900	330		900	730	560		222	326	90		460	595	640
575	595	738		820	900	320		900	265	730		655	546	460		651	540	900
856	610	900		325	680	900		900	330	595		410	386	245		603	720	900
900	705	566		610	594	260		850	396	565		190	900	900		900	900	900
900	900	900		900	215	254		745	670	455		853	484	474		214	530	278
900	490	218		900	630	350		796	760	620		305	900	299		555	900	220
520	900	900		455	370	74		30	502	506		900	491	30		277	660	190
182	900	501		730	570	154		386	473	405		485	900	59		900	900	193
900	496	900		900	260	790		264	610	900		525	900	140		900	390	900
834	900	173		865	900	610		610	205	900		900	67	185		525	520	225
766	689	900		576	900	685		685	506	900		360	900	670		443	210	76
797	420	840		490	515	130		156	572	873		249	812	165		900	405	315
230	343	377		462	900	86		790	640	790		900	692	900		689	525	900
125	640	900		396	456	4		265	670	745		900	340	310		420	900	330
344	900	900		370	900	25		622	768	130		345	345	288		343	630	250
613	900	450		735	790	622		575	900	900		890	900	10			900	612
843	900	900		895	756	465		636	383	685		900	835	385			900
856	842	745		513	853	190		550	850	636				250			900
247	422	790		550		260		900		370				330			420
612	900	900				670		900		433				164			110	--
678	851					185		900						900			900	--
900	900					122								900			510	--
810	900					216											382	--
900						512												--
900						432												--
						370												--
						481												--
						642												--
