# Supplementary material for: Modulation of flight and feeding behaviours requires presynaptic IP3Rs in dopaminergic neurons
Source: eLife. 2020 Nov 6;9:e62297. doi: 10.7554/eLife.62297 (PMC7647402; doi:10.7554/eLife.62297)
Supplement: Figure 3—source data 5. [file elife-62297-fig3-data5.xlsx]

## Sheet: Figure 3 - figure supplement 1C
MB296/+	dsmAChR/+	MB296B>dsmAChR
900	810	297
277	723	148
900	862	900
820	260	900
870	860	900
435	309	516
490	522	510
285	750	224
900	46	890
900	301	191
94	625	825
900	740	630
195	832	275
740	676	485
222	326	124
655	546	416
410	386	235
190	900	496
853	484	387
305	900	390
900	491	90
485	900	443
525	900	504
900	67	110
360	900	620
249	812	168
900	692	842
900	340	173
345	345	118
890	900	222
900	835	139
		332
		352
		659
