# Supplementary material for: Modulation of flight and feeding behaviours requires presynaptic IP3Rs in dopaminergic neurons
Source: eLife. 2020 Nov 6;9:e62297. doi: 10.7554/eLife.62297 (PMC7647402; doi:10.7554/eLife.62297)
Supplement: Figure 4—source data 1. [file elife-62297-fig4-data1.xlsx]

## Sheet: Figure4A
22 degree				Whole pupal (29 degree)				0-48 APF (29 degree)				48-96 APF (29 degree)				adults (29 degree)
SHIBIRE/+	THD'>SHIBIRE	MB296B>SHIBIRE		SHIBIRE/+	THD'>SHIBIRE	MB296B>SHIBIRE		SHIBIRE/+	THD'>SHIBIRE	MB296B>SHIBIRE		SHIBIRE/+	THD'>SHIBIRE	MB296B>SHIBIRE		SHIBIRE/+	THD'>SHIBIRE	MB296B>SHIBIRE
900	460	349		900	90	322		900	554	383		89	900	70		800	124	312
900	495	596		545	190	263		785	290	284		359	363	900		820	150	5
846	615	797		553	170	468		584	260	290		725	51	336		320	188	260
720	390	661		304	215	575		314	344	770		900	900	203		380	175	10
537	645	900		270	41	513		570	361	900		475	544	900		190	115	156
900	808	900		260	90	630		140	721	300		900	221	90		100	160	60
550	365	900		900	80	372		825	900	900		390	568	446		480	32	42
900	650	56		312	203	389		573	900	900		570	229	317		662	246	123
900	285	551		630	107	467		450	850	855		900	244	690		747	148	95
343	416	578		900	99	339		480	0	570		900	170	91		900	900	70
747	352	900		345	410	192		885	600	344		244	332	228		671	439	0
575	711	670		575	115	117		635	900	453		200	587	230		580	740	30
587	610	785		630	70	115		750	900	180		900	370	900		150	197	22
900	705	616		900	265	145		900	885	900		330	372	30		665	189	732
900	900	900		900	193	733		900	174	57		350	192	45		170	900	90
900	490	720		649	900	900		709	900	900		252	530	780		900	805	508
720	900	890		342	683	855		355	633	875		620	380	610		210	750	137
182	900	750		90	169	191		450	900	785		900	900	60		252	234	147
900	496	825		225	78	336		585	725	464		470	900	541		900	415	120
900	900	598		390	214	154		900	344	494		510	224	320		30	865	565
766	450	900		250	45	119		900	554	210		780	285	670		900	650	16
797	325	849		830	363	36		830	510	787		730	720	850		900	299	30
478	900	733		130	465	55		850	800	885		780	480	900		445	84	372
494	900	299		900	132	372		900	765	813		660	780	900		210	90	307
549	196	776		290	333	814		890	873	870		415	475	641		900	62	89
613	792	557		900	47	753		835	450	589		480	48	231		245	274	252
843	900	743		900	132	144		900	486	893		793	170	270		900	572	363
750	842	693		785	415	475		785	895	515		840	210	70		30	395	76
247	422	809		680	153	275		740	575	750		900	33	145		900	572	830
612	900	210		900	132	86		900	870	900		900		226		900	419	22
710	851	900		503	595	93		503	900	900				69		445	498	26
703	900	900		273	424	125		573	900	750						210	340	160
810	900			385	176	536		445								900	24	267
900																245	76	281
900																900		310
																720		237
																		287
																		606
																		463
																		545
																		510
																		535
