# Supplementary material for: Modulation of flight and feeding behaviours requires presynaptic IP3Rs in dopaminergic neurons
Source: eLife. 2020 Nov 6;9:e62297. doi: 10.7554/eLife.62297 (PMC7647402; doi:10.7554/eLife.62297)
Supplement: Figure 4—source data 2. [file elife-62297-fig4-data2.xlsx]

## Sheet: Figure 4C
starved
ItprDN/+		MB296B/+	MB296B>GFP	MB296B>ItprDN		THd'/+	THD'>GFP	THD'>ItprDN
0.78833		0.875	0.83167	0		0.905	0.74167	0.99333
0.545		0.87333	0.94167	0		0.885	0.995	0.49167
0.62667		0.73167	0	0		0.375	0.925	0
0.78333		0.74167	0.53333	0.81667		0.88333	0.95	0
0.95		0.77	0.71167	0		0.91833	0.89667	0
0.95167		0.80333	0.90667	0.56667		0.865	0.91167	0
0.48333		0.8	0.31667	0.02333		0.89	0.935	0.24167
0.80667		0.75	0.95167	0.275		0.93333	0.225	0.37333
0.87		0	0.875	0		0.85	0.86833	0.17667
0		0.81333	0.41667	0		0.975	0.935	0.97833
0.56667		0.85	0.95167	0		0.92	0.29333	0.58
0.81167		0.68333	0.96	0		0.88333	0	0.55
0.33		0.65833	0.71667	0.75167		0.775	0.78667	0.575
0.86833		0.84167	0.68333	0.14		0.97333	0.94333	0.18333
0.95667		0.95	0.11667	0.05		0.94	0	0.92833
0		0.93333	0.785	0.72833		0.93333	0.075	0
0.35		0.65833	0.64333	0.59833		0.81833	0.28333	0.06667
0.93667		0.875	0.65833	0.54167		0.73333	0.92667	0.175
0.80833		0.85	0.82333	0.83333		0.35333	0.91333	0
0.84167		0.90167	0.21667	0		0.92667	0.76333	0.28333
0.99167		0.78333	0.805	0		0.86167	0.94333	0.11667
0.895		0.7	0.98167	0.30833		0.72	0.88333	0.82333
0.93		0.775	0.08333	0.61667		0.92667	0.82333	0
0.81667		0.89167	0.635	0		0.86167	0	0.79
0.975		0.85	0.78333	0		0.72	0.99333	0
0.26167		0.86333	0.95	0		0.93833	0.99167	0.60833
0.78333		0.83667	0.88333	0		0.895	0.81667	0
0.65833		0.83	0.85833	0.23		0.85833	0.78333	0.78333
0.93		0.735	0.79833	0.15		0.35	0.825	0.05833
0.89167		0.76833	0.925	0.035		0.71333	0.95	0.53333
0.945				0		0.96667		0
0.78						0.98333
0.90167						0.96
						0.95333
						0.70833
						0.875
