# Supplementary material for: Modulation of flight and feeding behaviours requires presynaptic IP3Rs in dopaminergic neurons
Source: eLife. 2020 Nov 6;9:e62297. doi: 10.7554/eLife.62297 (PMC7647402; doi:10.7554/eLife.62297)
Supplement: Figure 4—source data 3. [file elife-62297-fig4-data3.xlsx]

## Sheet: Figure4D
starved
dsmAChR/+		THD'/+	THD' > dsmAChR		MB296B/+	MB296B>dsmAChR
0.915		0.79	0.88333		0.79	0.83333
0.88167		0.73	0.725		0.91167	0.61667
0.93		0.82333	0.73833		0.86667	0.635
0.89667		0.625	0.70333		0.76667	0
0.75		0.75167	0		0.81333	0
0.78333		0.89667	0.62		0.98333	0
0.825		0.75333	0.44		0.78333	0.29167
0.68333		0.87167	0.85167		0.65333	0.08333
0.98333		0.54	0		0.49	0.70167
0.975		0.88333	0.03333		0.47667	0.67833
0.65833		0.685	0.13333		0	0.59833
0.55167		0.68333	0		0.57	0
0.87333		0.82333	0.365		0.66167	0
0.835		0.93333	0.75167		0.61667	0.67667
0.60667		0.615	0		0.49667	0
0.84167		0.59167	0		0.92833	0
0.57333		0.70667	0		0.90167	0
0.91667		0.76667	0		0.87833	0
0.515		0.76333	0.48333		0.8	0
0.825		0.68333	0.00833		0.625	0.39667
0.69167		0	0.11667		0.17833	0.04167
0.68333		0.31667	0		0	0.08167
0.775		0.98333	0		0.885	0.76667
0.935		0.68333	0.84167		0.645	0.54
0.58333		0.73333	0.76333		0.40333	0.40167
0.97333		0.88333	0.77833		0.875	0
0.575		0.85	0		0.26833	0
0.76333		0.8	0.21667		0.37333	0.94167
0.685		0.75833	0		0.89167	0.71833
0.82333		0.98333	0		0.95	0
		0.90833			0.975	0
		0.935			0.95833
		0.94			0.89167
					0.94
