# Supplementary material for: Modulation of flight and feeding behaviours requires presynaptic IP3Rs in dopaminergic neurons
Source: eLife. 2020 Nov 6;9:e62297. doi: 10.7554/eLife.62297 (PMC7647402; doi:10.7554/eLife.62297)
Supplement: Figure 4—source data 4. [file elife-62297-fig4-data4.xlsx]

## Sheet:  Figure 4 - figure supplement1A
25 degree
uasshibire	THD'>shibire	296>shibire
900	360	900
842	378	555
900	538	184
281	863	303
884	579	348
230	660	410
425	308	354
481	59	900
340	605	532
900	599	660
900	69	301
203	900	900
510	822	492
440	633	361
333	655	507
900	195	225
900	900	605
900	221	572
900	900	154
788	900	429
340	260	900
430	900	430
345	466	360
485	238	900
900	900	324
390	393	630
900	815	239
822	670	750
462	286	730
740	469
715
806
