# Supplementary material for: Modulation of flight and feeding behaviours requires presynaptic IP3Rs in dopaminergic neurons
Source: eLife. 2020 Nov 6;9:e62297. doi: 10.7554/eLife.62297 (PMC7647402; doi:10.7554/eLife.62297)
Supplement: Figure 4—source data 5. [file elife-62297-fig4-data5.xlsx]

## Sheet:  Figure 4 - figure supplement1B
fed
ItprDN/+		MB296B/+	MB296B>GFP	MB296B>ItprDN		THd'/+	THD'>GFP	THD'>ItprDN
0		0	0	0		0	0	0
0		0	0	0		0	0	0
0		0	0	0		0	0	0
0.69833		0.375	0.62833	0		0.48333	0	0.61667
0.45		0.33333	0	0		0.78333	0	0
0.20167		0	0	0		0	0	0
0		0	0	0		0	0	0
0		0	0	0		0	0	0.00833
0		0	0.14667	0		0	0	0.15
0		0	0	0		0	0	0.48667
0		0	0	0		0	0.665	0
0		0	0	0		0.245	0	0
0.61667		0	0	0		0.175	0	0
0.56167		0	0	0		0	0	0
0		0.025	0	0		0	0	0.13333
0		0.11667	0	0		0	0	0
0		0	0	0		0.08333	0.82833	0
0		0	0	0		0	0	0
0.08333		0	0	0.14167		0	0	0
0		0	0.225	0.08333		0.21667	0	0
0		0	0.16667	0.26167		0	0.03333	0
0.15833		0	0	0		0	0	0
0		0	0	0		0.89167	0	0
0		0.14167	0.00833	0		0	0	0.01667
0.22833		0.08333	0	0.06833		0	0	0
0		0.24	0	0.16167		0.545	0	0.46667
0		0	0.36167	0		0	0	0
0.14		0	0	0		0.775	0	0.075
		0					0.11667	0
							0.06833
							0.78333
							0.25
								0.70833
								0.875
