# Supplementary material for: Modulation of flight and feeding behaviours requires presynaptic IP3Rs in dopaminergic neurons
Source: eLife. 2020 Nov 6;9:e62297. doi: 10.7554/eLife.62297 (PMC7647402; doi:10.7554/eLife.62297)
Supplement: Figure 4—source data 6. [file elife-62297-fig4-data6.xlsx]

## Sheet:  Figure 4 - figure supplement1C
fed
dsmAChR/+		THD'/+	THD'>dsmAChR		MB296B/+	MB296B>dsmAChR
0.38333		0	0		0	0.38333
0.16833		0	0		0	0.16833
0.05833		0	0		0	0.05833
0		0	0		0	0
0		0	0		0	0
0.59667		0.475	0		0	0.59667
0.075		0.66667	0.51667		0	0.075
0		0.77333	0		0.875	0
0		0	0		0	0
0		0	0.97833		0	0
0		0	0		0.25	0
0		0	0		0	0
0		0	0.275		0	0
0		0.235	0.34167		0	0
0.08333		0.00833	0		0.08333	0.08333
0.11667		0	0		0.11667	0.11667
0		0	0.18333		0	0
0		0	0		0	0
0.20833		0.08333	0		0	0.20833
0.07833		0	0.00833		0	0.07833
0		0	0		0	0
0		-0.45	0.57833		0	0
0		0.31667	0		0	0
0		0	0		0	0
0		0.89167	0		0.08333	0
0		0	0		0.13	0
0.36167		0.645	0		0	0.36167
0.28333		0.545	0		0.275	0.28333
0.02667		0	0.55667		0.33	0.02667
1		0.775	0		0	1
		0	0
